# Supplementary material for: Propensity-Score-Matched Evaluation of Adverse Events Affecting Recovery after COVID-19 Vaccination: On Adenovirus and mRNA Vaccines
Source: MDPI journal article supplement (doi:10.3390/vaccines10020284), 2022-02-13
Supplement: s1 [file s1]

# **Propensity Score-Matched Evaluation of Adverse Events Affecting Recovery After COVID-19 Vaccination: On Adenovirus and mRNA Vaccines**

**Chang-Sik Son \*, Sang-Hyeon Jin and Won-Seok Kang \***

Division of Intelligent Robot, Daegu Gyeongbuk Institute of Science and Technology (DGIST), Daegu 42988, South Korea; jinjinsh@dgist.ac.kr (S.H.J.)

\* Correspondence: changsikson@dgist.ac.kr (C.S.S.); wskang@dgist.ac.kr (W.S.K.)

### **Supplementary information**

**Supplementary Table S1.** Baseline characteristics of individuals vaccinated with the Janssen COVID-19 vaccine before and after PSM.

**Supplementary Table S2.** Baseline characteristics of individuals vaccinated with the Moderna COVID-19 vaccine before and after PSM.

**Supplementary Table S3.** Baseline characteristics of individuals vaccinated with the Pfizer-BioNTech COVID-19 vaccine before and after PSM.

**Supplementary Figure S1.** AE hazard ratios after Janssen COVID-19 vaccination estimated from a multivariate Cox model.

**Supplementary Figure S2.** AE hazard ratios after Moderna COVID-19 vaccination estimated from a multivariate Cox model.

**Supplementary Figure S3.** AE hazard ratios after Pfizer-BioNTech COVID-19 vaccination estimated from a multivariate Cox model.

**Table S1.** Baseline characteristics of individuals vaccinated with the Janssen COVID-19 vaccine before and after PSM.

| Variable                   | Before PSM    |               |       |         | After PSM     |               |       |         |
|----------------------------|---------------|---------------|-------|---------|---------------|---------------|-------|---------|
|                            | No Recovery   | Recovery      | ASD   | P-value | No Recovery   | Recovery      | ASD   | P-value |
| Total, N                   | 10,274        | 11,763        |       |         | 9,731         | 9,731         |       |         |
| Age                        |               |               |       | 0.000   |               |               |       | 0.949   |
| 20-29, N (%)               | 1,443 (14.05) | 2,790 (23.72) | 0.249 |         | 1,443 (14.83) | 1,421 (14.6)  | 0.006 |         |
| 30-39, N (%)               | 2,115 (20.59) | 2,715 (23.08) | 0.060 |         | 2,107 (21.65) | 2,097 (21.55) | 0.002 |         |
| 40-49, N (%)               | 2,178 (21.2)  | 2,146 (18.24) | 0.074 |         | 2,084 (21.42) | 2,106 (21.64) | 0.006 |         |
| 50-59, N (%)               | 2,342 (22.8)  | 2,278 (19.37) | 0.084 |         | 2,220 (22.81) | 2,277 (23.4)  | 0.014 |         |
| 60-69, N (%)               | 1,545 (15.04) | 1,382 (11.75) | 0.097 |         | 1,413 (14.52) | 1,380 (14.18) | 0.010 |         |
| 70-79, N (%)               | 462 (4.5)     | 349 (2.97)    | 0.081 |         | 359 (3.69)    | 347 (3.57)    | 0.007 |         |
| ≥80, N (%)                 | 189 (1.84)    | 103 (0.88)    | 0.083 |         | 105 (1.08)    | 103 (1.06)    | 0.002 |         |
| Gender                     |               |               |       | 0.000   |               |               |       | 0.783   |
| Unknown, N (%)             | 13 (0.13)     | 21 (0.18)     | 0.013 |         | 13 (0.13)     | 12 (0.12)     | 0.003 |         |
| Male, N (%)                | 3,174 (30.89) | 4,264 (36.25) | 0.114 |         | 3,056 (31.4)  | 3,013 (30.96) | 0.010 |         |
| Female, N (%)              | 7,087 (68.98) | 7,478 (63.57) | 0.115 |         | 6,662 (68.46) | 6,706 (68.91) | 0.010 |         |
| Underlying disability      |               |               |       |         |               |               |       |         |
| Obesity, N (%)             | 158 (1.54)    | 122 (1.04)    | 0.044 | 0.001   | 135 (1.39)    | 118 (1.21)    | 0.015 | 0.311   |
| Hypertension, N (%)        | 814 (7.92)    | 623 (5.3)     | 0.106 | 0.000   | 646 (6.64)    | 611 (6.28)    | 0.015 | 0.321   |
| Diabetes, N (%)            | 467 (4.55)    | 325 (2.76)    | 0.095 | 0.000   | 356 (3.66)    | 324 (3.33)    | 0.018 | 0.226   |
| Atrial fibrillation, N (%) | 15 (0.15)     | 19 (0.16)     | 0.004 | 0.904   | 14 (0.14)     | 12 (0.12)     | 0.006 | 0.844   |
| Heart failure, N (%)       | 82 (0.8)      | 44 (0.37)     | 0.056 | 0.000   | 55 (0.57)     | 44 (0.45)     | 0.016 | 0.314   |
| Kidney disease, N (%)      | 46 (0.45)     | 32 (0.27)     | 0.029 | 0.038   | 34 (0.35)     | 31 (0.32)     | 0.005 | 0.804   |
| Pulmonary disease, N (%)   | 135 (1.31)    | 52 (0.44)     | 0.094 | 0.000   | 55 (0.57)     | 52 (0.53)     | 0.004 | 0.846   |
| Asthma, N (%)              | 578 (5.63)    | 483 (4.11)    | 0.071 | 0.000   | 491 (5.05)    | 479 (4.92)    | 0.006 | 0.717   |
| Stroke, N (%)              | 18 (0.18)     | 18 (0.15)     | 0.005 | 0.811   | 16 (0.16)     | 17 (0.17)     | 0.002 | 1.000   |
| Cancers, N (%)             | 111 (1.08)    | 89 (0.76)     | 0.034 | 0.014   | 90 (0.92)     | 87 (0.89)     | 0.003 | 0.880   |
| Allergies, N (%)           | 296 (2.88)    | 263 (2.24)    | 0.041 | 0.003   | 256 (2.63)    | 249 (2.56)    | 0.005 | 0.787   |

Note: ASD, absolute standardised difference; P-values were calculated using Pearson's chi-squared tests.

**Table S2.** Baseline characteristics of individuals vaccinated with the Moderna COVID-19 vaccine before and after PSM.

| Variable                   | Before PSM     |                |       |         | After PSM      |                |       |         |
|----------------------------|----------------|----------------|-------|---------|----------------|----------------|-------|---------|
|                            | No Recovery    | Recovery       | ASD   | P-value | No Recovery    | Recovery       | ASD   | P-value |
| Total, N                   | 63,170         | 63,668         |       |         | 60,290         | 60,290         |       |         |
| Age                        |                |                |       | 0.000   |                |                |       | 0.206   |
| 20-29, N (%)               | 6,079 (9.62)   | 7,555 (11.87)  | 0.072 |         | 6,073 (10.07)  | 6,006 (9.96)   | 0.004 |         |
| 30-39, N (%)               | 11,367 (17.99) | 11,189 (17.57) | 0.011 |         | 10,673 (17.7)  | 10,513 (17.44) | 0.007 |         |
| 40-49, N (%)               | 11,949 (18.92) | 11,034 (17.33) | 0.041 |         | 10,802 (17.92) | 10,902 (18.08) | 0.004 |         |
| 50-59, N (%)               | 11,629 (18.41) | 11,670 (18.33) | 0.002 |         | 11,334 (18.8)  | 11,314 (18.77) | 0.001 |         |
| 60-69, N (%)               | 11,762 (18.62) | 12,346 (19.39) | 0.020 |         | 11,501 (19.08) | 11,695 (19.4)  | 0.008 |         |
| 70-79, N (%)               | 7,559 (11.97)  | 7,481 (11.75)  | 0.007 |         | 7,377 (12.24)  | 7,473 (12.4)   | 0.005 |         |
| ≥80, N (%)                 | 2,825 (4.47)   | 2,393 (3.76)   | 0.036 |         | 2,530 (4.2)    | 2,387 (3.96)   | 0.012 |         |
| Gender                     |                |                |       | 0.000   |                |                |       | 0.652   |
| Unknown, N (%)             | 85 (0.13)      | 140 (0.22)     | 0.020 |         | 82 (0.14)      | 83 (0.14)      | 0.000 |         |
| Male, N (%)                | 14,122 (22.36) | 16,039 (25.19) | 0.067 |         | 13,976 (23.18) | 13,841 (22.96) | 0.005 |         |
| Female, N (%)              | 48,963 (77.51) | 47,489 (74.59) | 0.068 |         | 46,232 (76.68) | 46,366 (76.9)  | 0.005 |         |
| Underlying disability      |                |                |       |         |                |                |       |         |
| Obesity, N (%)             | 1,119 (1.77)   | 908 (1.43)     | 0.028 | 0.000   | 939 (1.56)     | 902 (1.5)      | 0.005 | 0.398   |
| Hypertension, N (%)        | 6,416 (10.16)  | 5,732 (9.0)    | 0.039 | 0.000   | 5,724 (9.49)   | 5,725 (9.5)    | 0.000 | 1.000   |
| Diabetes, N (%)            | 3,660 (5.79)   | 3,239 (5.09)   | 0.031 | 0.000   | 3,213 (5.33)   | 3,234 (5.36)   | 0.002 | 0.798   |
| Atrial fibrillation, N (%) | 184 (0.29)     | 180 (0.28)     | 0.002 | 0.816   | 172 (0.29)     | 170 (0.28)     | 0.001 | 0.957   |
| Heart failure, N (%)       | 598 (0.95)     | 475 (0.75)     | 0.022 | 0.000   | 495 (0.82)     | 472 (0.78)     | 0.004 | 0.478   |
| Kidney disease, N (%)      | 411 (0.65)     | 371 (0.58)     | 0.009 | 0.131   | 374 (0.62)     | 361 (0.6)      | 0.003 | 0.657   |
| Pulmonary disease, N (%)   | 779 (1.23)     | 617 (0.97)     | 0.025 | 0.000   | 621 (1.03)     | 612 (1.02)     | 0.001 | 0.819   |
| Asthma, N (%)              | 3,401 (5.38)   | 3,179 (4.99)   | 0.018 | 0.002   | 3,102 (5.15)   | 3,155 (5.23)   | 0.004 | 0.500   |
| Stroke, N (%)              | 160 (0.25)     | 125 (0.2)      | 0.012 | 0.037   | 139 (0.23)     | 124 (0.21)     | 0.005 | 0.387   |
| Cancers, N (%)             | 926 (1.47)     | 842 (1.32)     | 0.012 | 0.031   | 853 (1.41)     | 840 (1.39)     | 0.002 | 0.769   |
| Allergies, N (%)           | 1,774 (2.81)   | 1,482 (2.33)   | 0.030 | 0.000   | 1,452 (2.41)   | 1,478 (2.45)   | 0.003 | 0.640   |

Note: ASD, absolute standardised difference; P-values were calculated using Pearson's chi-squared tests.

**Table S3.** Baseline characteristics of individuals vaccinated with the Pfizer-BioNTech COVID-19 vaccine before and after PSM.

| Variable                   | Before PSM     |                |       |         | After PSM      |                |       |         |
|----------------------------|----------------|----------------|-------|---------|----------------|----------------|-------|---------|
|                            | No Recovery    | Recovery       | ASD   | P-value | No Recovery    | Recovery       | ASD   | P-value |
| Total, N                   | 54,729         | 53,390         |       |         | 50,376         | 50,376         |       |         |
| Age                        |                |                |       | 0.000   |                |                |       | 0.979   |
| 20-29, N (%)               | 5,610 (10.25)  | 7,817 (14.64)  | 0.133 |         | 5,600 (11.12)  | 5,602 (11.12)  | 0.000 |         |
| 30-39, N (%)               | 10,213 (18.66) | 10,743 (20.12) | 0.037 |         | 10,210 (20.27) | 10,186 (20.22) | 0.001 |         |
| 40-49, N (%)               | 11,178 (20.42) | 10,239 (19.18) | 0.031 |         | 10,199 (20.25) | 10,186 (20.22) | 0.001 |         |
| 50-59, N (%)               | 11,108 (20.3)  | 9,921 (18.58)  | 0.043 |         | 9,910 (19.67)  | 9,885 (19.62)  | 0.001 |         |
| 60-69, N (%)               | 9,278 (16.95)  | 8,516 (15.95)  | 0.027 |         | 8,408 (16.69)  | 8,385 (16.64)  | 0.001 |         |
| 70-79, N (%)               | 5,150 (9.41)   | 4,489 (8.41)   | 0.035 |         | 4,376 (8.69)   | 4,471 (8.88)   | 0.007 |         |
| ≥80, N (%)                 | 2,192 (4.01)   | 1,665 (3.12)   | 0.048 |         | 1,673 (3.32)   | 1,661 (3.3)    | 0.001 |         |
| Gender                     |                |                |       | 0.000   |                |                |       | 0.068   |
| Unknown, N (%)             | 157 (0.29)     | 302 (0.57)     | 0.043 |         | 156 (0.31)     | 155 (0.31)     | 0.000 |         |
| Male, N (%)                | 14,809 (27.06) | 13,872 (25.98) | 0.024 |         | 12,768 (25.35) | 12,450 (24.71) | 0.015 |         |
| Female, N (%)              | 39,763 (72.65) | 39,216 (73.45) | 0.018 |         | 37,452 (74.34) | 37,771 (74.98) | 0.015 |         |
| Underlying disability      |                |                |       |         |                |                |       |         |
| Obesity, N (%)             | 692 (1.26)     | 686 (1.28)     | 0.002 | 0.785   | 655 (1.3)      | 674 (1.34)     | 0.003 | 0.619   |
| Hypertension, N (%)        | 3,945 (7.21)   | 3,815 (7.15)   | 0.002 | 0.698   | 3,827 (7.6)    | 3,674 (7.29)   | 0.012 | 0.068   |
| Diabetes, N (%)            | 2,321 (4.24)   | 1,967 (3.68)   | 0.029 | 0.000   | 19,98 (3.97)   | 1,948 (3.87)   | 0.005 | 0.426   |
| Atrial fibrillation, N (%) | 152 (0.28)     | 135 (0.25)     | 0.005 | 0.462   | 136 (0.27)     | 133 (0.26)     | 0.001 | 0.903   |
| Heart failure, N (%)       | 384 (0.7)      | 292 (0.55)     | 0.020 | 0.001   | 308 (0.61)     | 287 (0.57)     | 0.005 | 0.411   |
| Kidney disease, N (%)      | 260 (0.48)     | 264 (0.49)     | 0.003 | 0.678   | 250 (0.5)      | 245 (0.49)     | 0.001 | 0.857   |
| Pulmonary disease, N (%)   | 469 (0.86)     | 329 (0.62)     | 0.028 | 0.000   | 301 (0.6)      | 326 (0.65)     | 0.006 | 0.336   |
| Asthma, N (%)              | 2,330 (4.26)   | 2,550 (4.78)   | 0.025 | 0.000   | 2,305 (4.58)   | 2,348 (4.66)   | 0.004 | 0.528   |
| Stroke, N (%)              | 118 (0.22)     | 116 (0.22)     | 0.000 | 0.995   | 114 (0.23)     | 108 (0.21)     | 0.003 | 0.737   |
| Cancers, N (%)             | 625 (1.14)     | 596 (1.12)     | 0.002 | 0.711   | 585 (1.16)     | 583 (1.16)     | 0.000 | 0.977   |
| Allergies, N (%)           | 1,304 (2.38)   | 1,253 (2.35)   | 0.002 | 0.714   | 1,227 (2.44)   | 1,207 (2.4)    | 0.003 | 0.697   |

Note: ASD, absolute standardised difference; P-values were calculated using Pearson's chi-squared test.

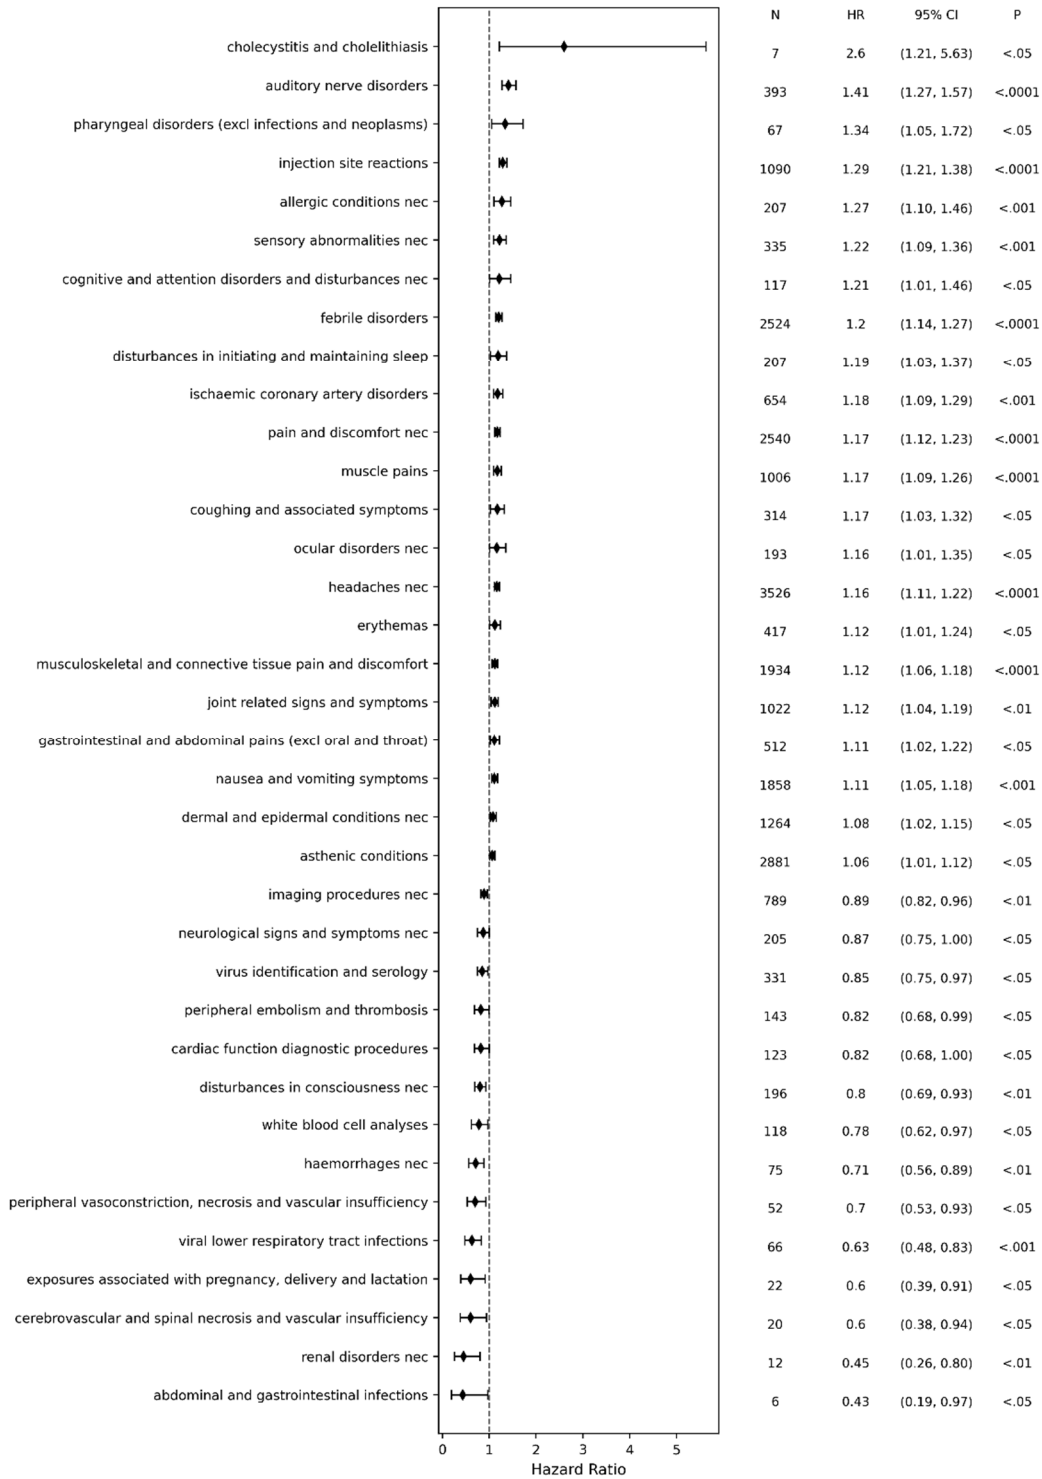

**Figure S1.** AE hazard ratios after Janssen COVID-19 vaccination estimated from a multivariate Cox model.

Note: this supplementary result shows 36 Janssen vaccine-induced AEs with a statistically significant difference ( $p < 0.05$ ) when 91 adverse symptoms associated with the risk of developing an AE, estimated with a univariate Cox proportional hazard regression analysis, were included in the multivariate Cox model for adjustment. N denotes the number of adverse cases in the non-recovered group; HR, hazard ratios; CI, confidence intervals.

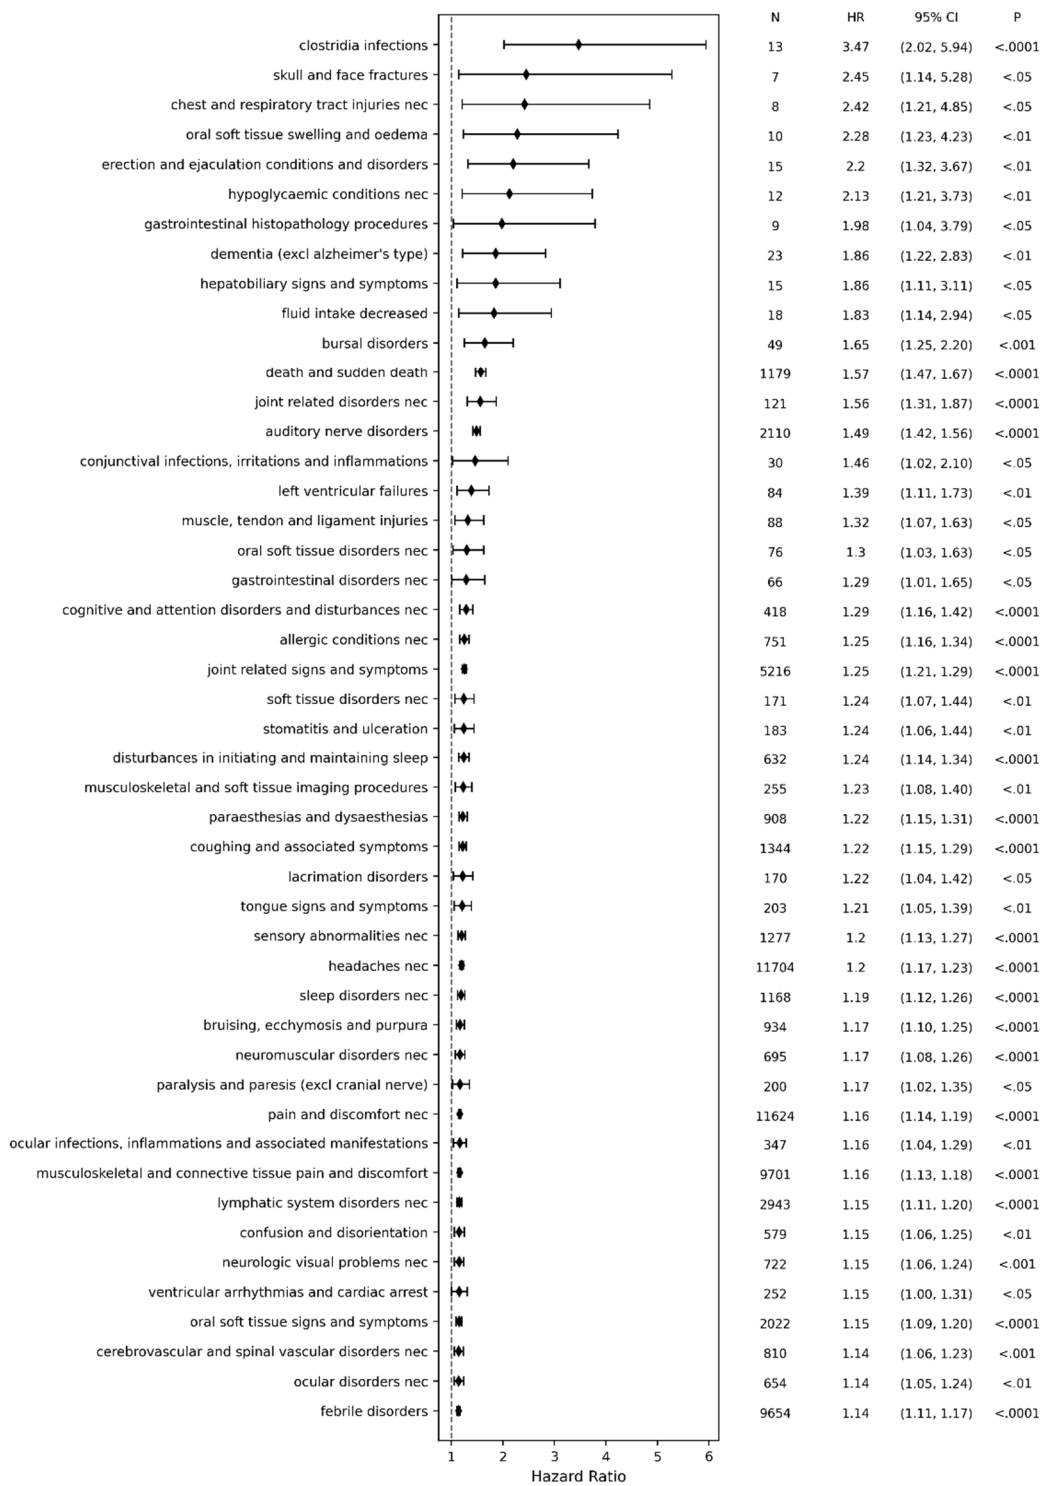

**Figure S2.** AE hazard ratios after Moderna COVID-19 vaccination estimated from a multivariate Cox model.

Note: this supplementary result shows 94 Moderna vaccine-induced AEs with a statistically significant difference ( $p < 0.05$ ) when 193 adverse symptoms associated with the risk of developing an AE, estimated with a univariate Cox proportional hazard regression analysis, were included in the multivariate Cox model for adjustment. N denotes the number of adverse cases in the non-recovered group; HR, hazard ratios; CI, confidence intervals.

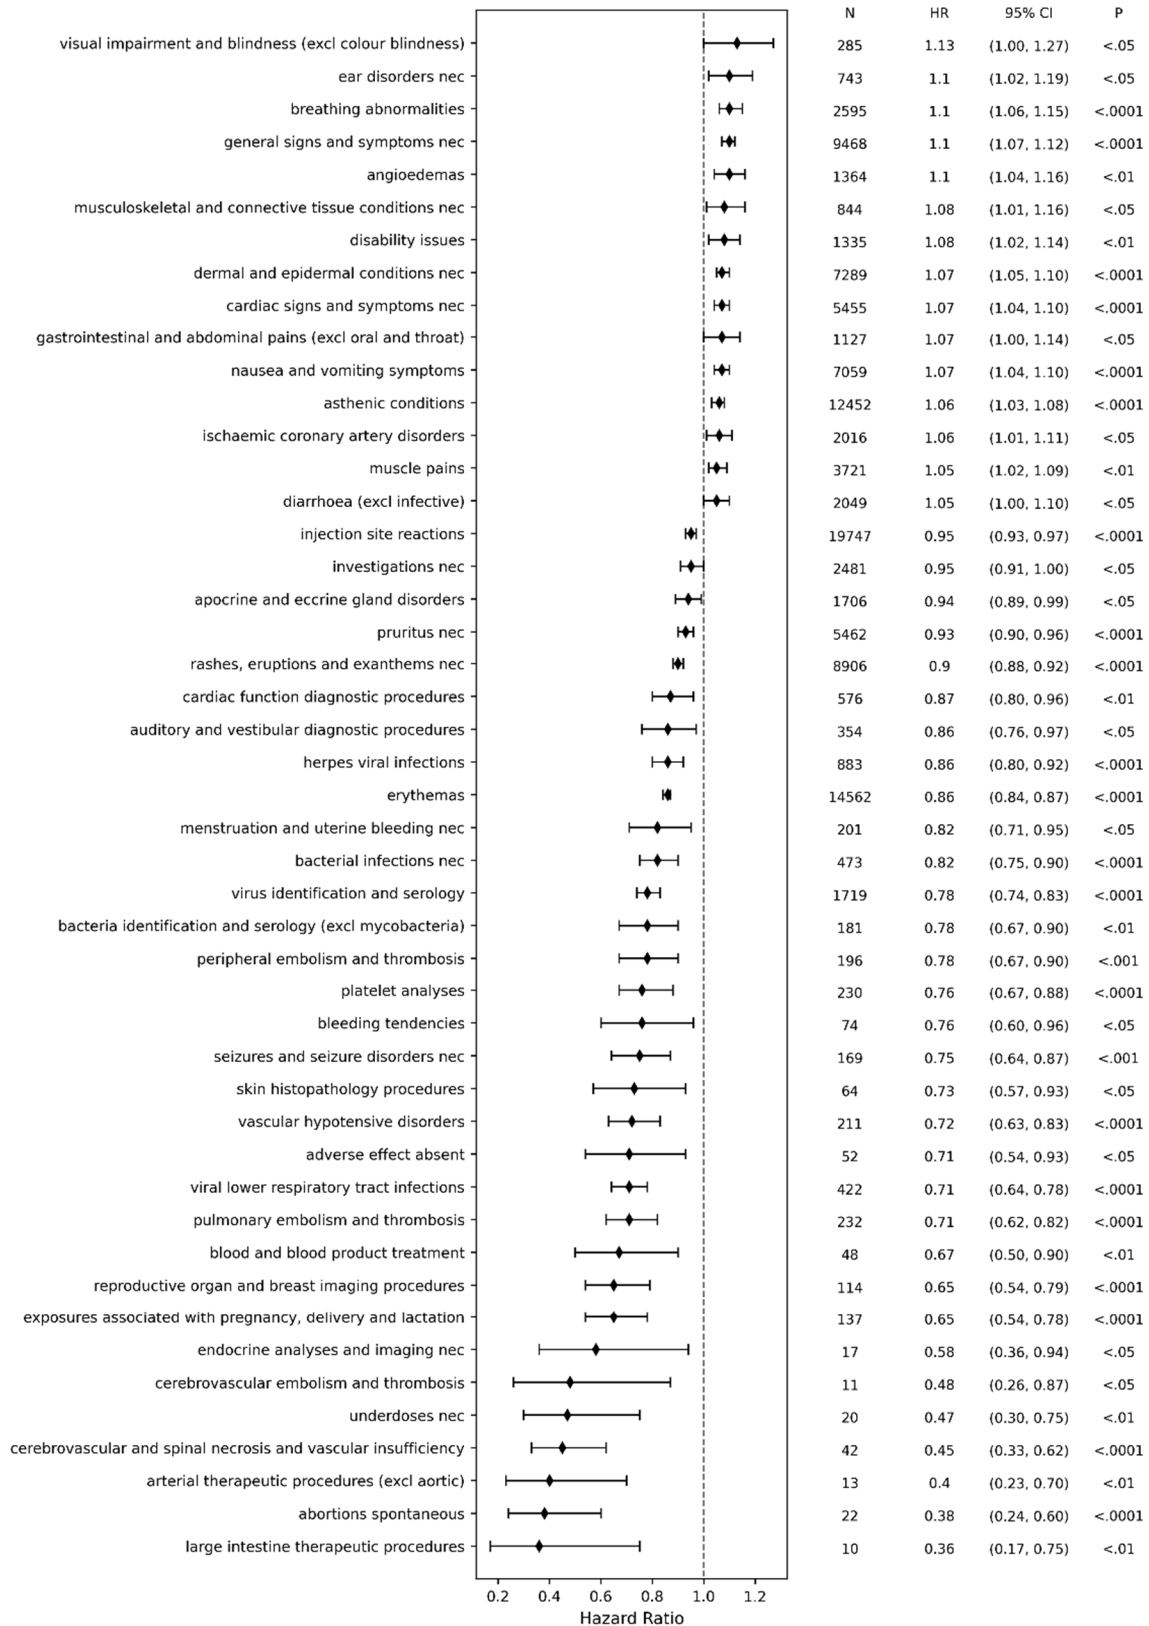

Figure S2. *Cont.*

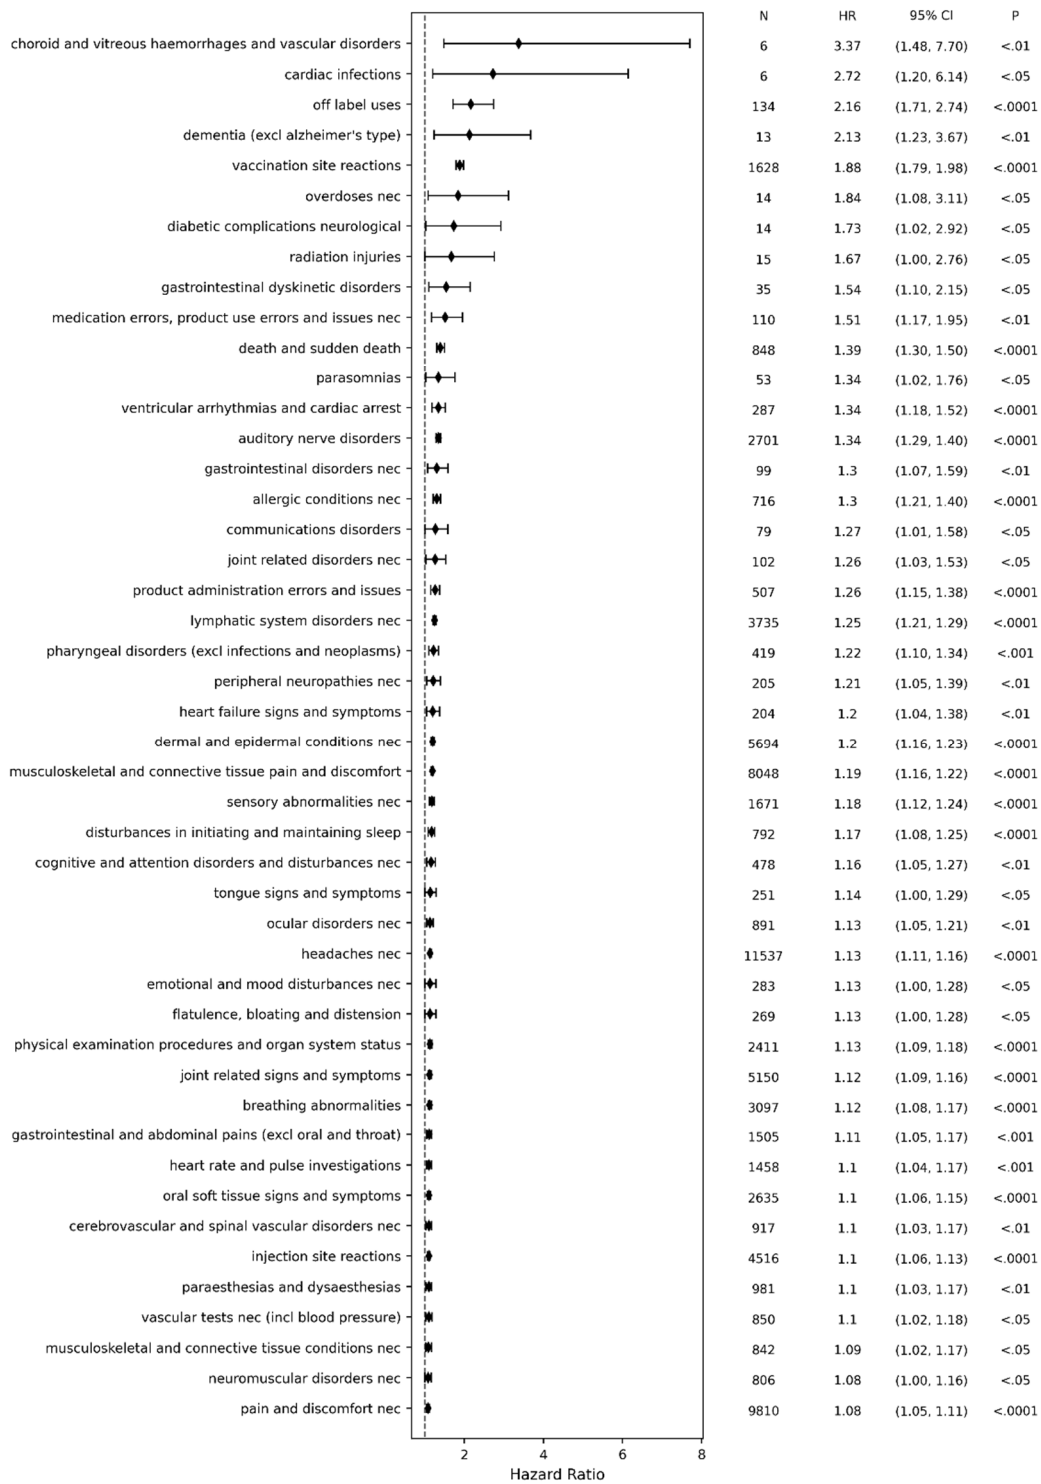

**Figure S3.** AE hazard ratios after Pfizer-BioNTech COVID-19 vaccination estimated from a multivariate Cox model.

Note: this supplementary result shows 92 Pfizer-BioNTech vaccine-induced AEs with a statistically significant difference ( $p < 0.05$ ) when 208 adverse symptoms associated with the risk of developing an AE, estimated with a univariate Cox proportional hazard regression analysis, were included in the multivariate Cox model for adjustment. N denotes the number of adverse cases in the non-recovered group; HR, hazard ratios; CI, confidence intervals.

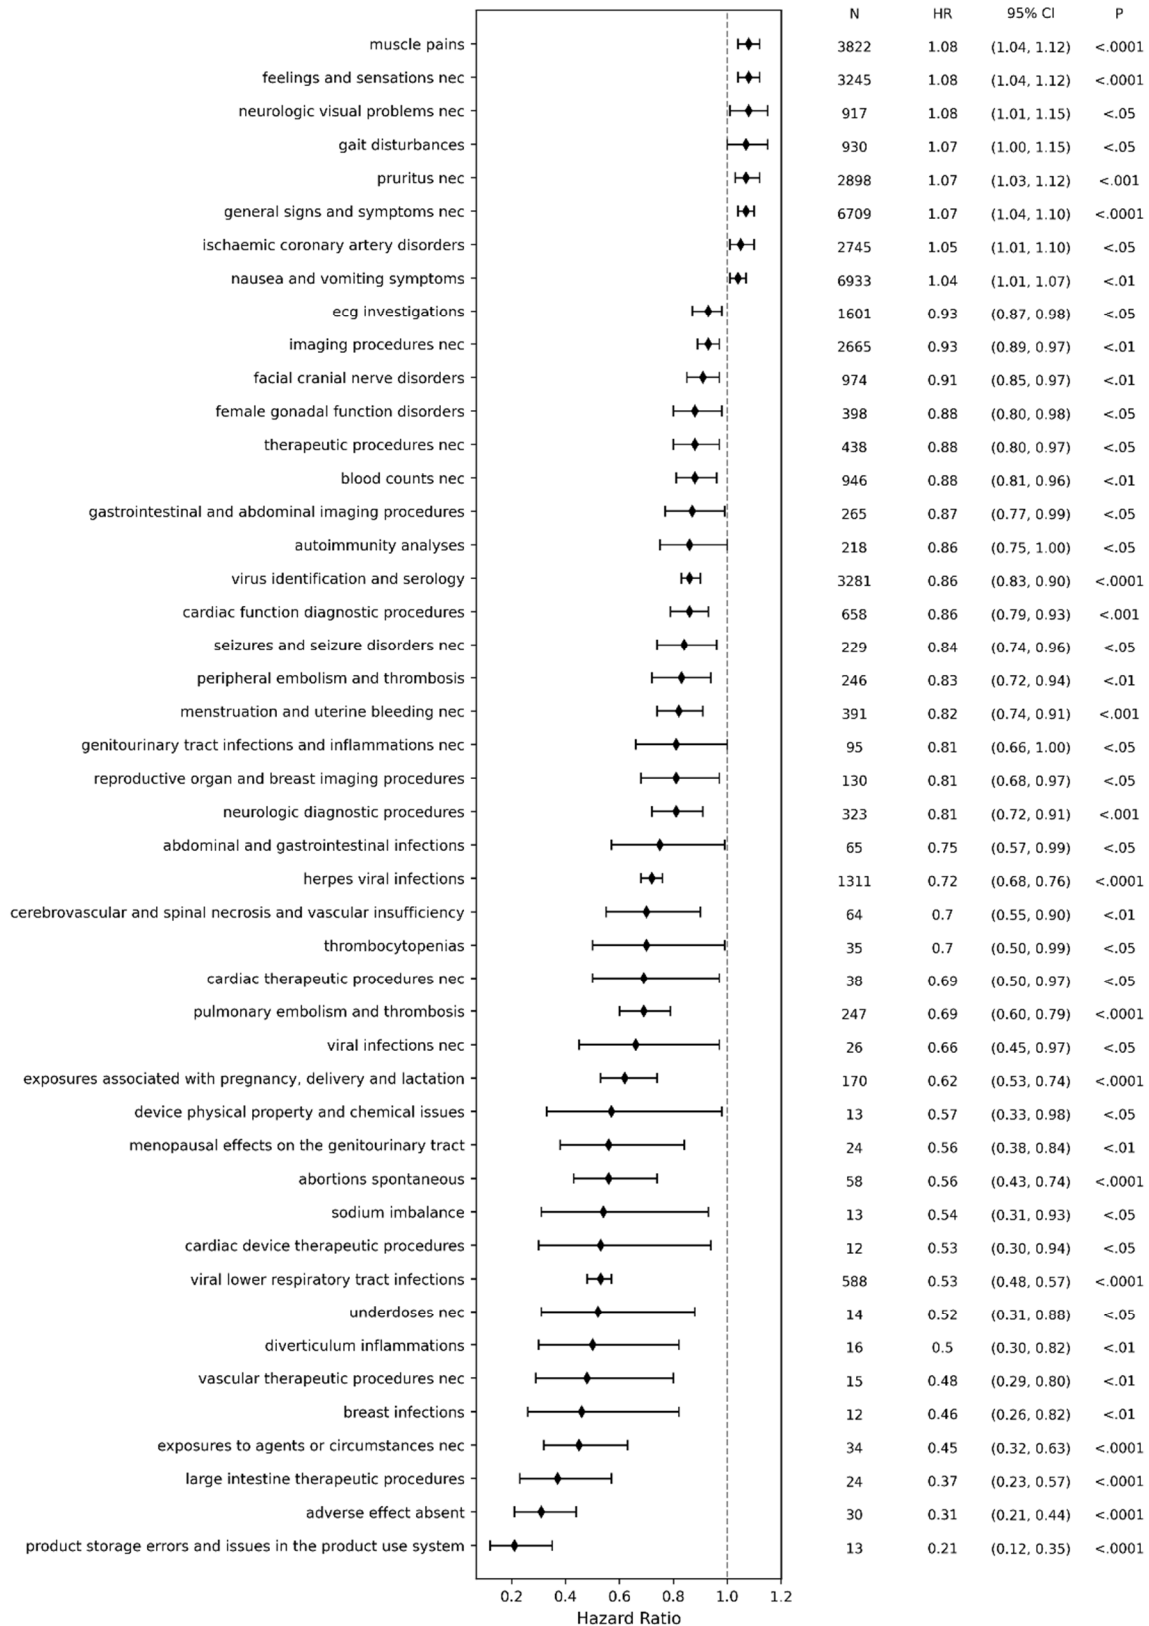

Figure S3. Cont.
